# Supplementary material for: Intrinsic Expression of Coagulation Factors and Protease Activated Receptor 1 (PAR1) in Photoreceptors and Inner Retinal Layers
Source: MDPI journal article supplement (doi:10.3390/ijms23020984), 2022-01-17
Supplement: s1 [file s1]

# Intrinsic Expression of Coagulation Factors and Protease Activated Receptor 1 (PAR1) in Photoreceptors and Inner Retinal Layers

## Supplementary

**Table S1: antibodies details**

| Antigen                    | Origin | Dilution | Manufacturer      | Catalog #  |
|----------------------------|--------|----------|-------------------|------------|
| PAR1                       | mouse  | 1:50     | Novus biologicals | NBP1-71770 |
| Rhodopsin                  | rabbit | 1:50     | Abcam             | ab74724    |
| Opsin, red/green           | rabbit | 1:100    | Millipore         | ab5405     |
| Opsin, blue                | rabbit | 1:100    | Millipore         | ab5407     |
| Secondary antibodies       | Origin | Dilution | Manufacturer      | Catalog #  |
| Anti-mouse CY3 conjugated  | donkey | 1:100    | Millipore         | AP192C     |
| Anti-rabbit IgG H&L (TITC) | Goat   | 1:100    | Abcam             | ab6717     |

**Table S2: Tested antibodies directed against PAR1**

| Origin | Manufacturer | Catalog # |
|--------|--------------|-----------|
| rabbit | Bioss        | Bs-0828R  |
| rabbit | Abcam        | ab32611   |
| rabbit | MyBioSource  | MBS273633 |

**Table S3: Primers**

| Gene             | Forward                 | Reverse                   |
|------------------|-------------------------|---------------------------|
| FPRT             | GATTAGCGATGATGAACCAGGTT | CCTCCCATCTCCTTCATGACA     |
| PAR1             | GCCTCCATCATGCTCATGAC    | AAAGCAGACGATGAAGATGCA     |
| FX               | GTGGCCGGGAATGCAA        | AACCCTTCATTGTCTTCGTTAATGA |
| PT (prothrombin) | CCGAAAGGGCAACCTAGAGC    | GGCCCAGAACACGTCTGTG       |

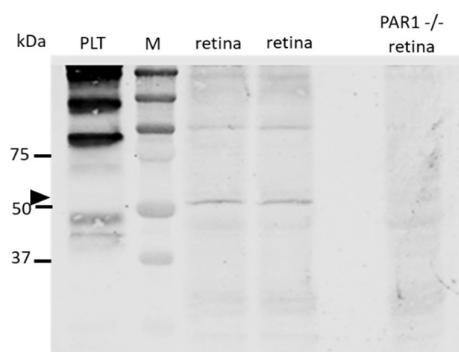

**Supplementary figure S1. Uncropped Western blot gel (WB) analysis of PAR1 confirms antibody specificity.** WB was performed with same antibody used for immunofluorescence analysis (NBP-71770, Nuvos biologicals). A ~52kDa protein was detected in lysates of retinas from C57BL/6J mice and platelets (PLT) but not in retina from PAR1 knockout mice (PAR1<sup>-/-</sup>) or mice platelets. Two representative retinal lysates are shown ("retina"). An empty lane was used to ensure no leakage between lanes.
